# Supplementary material for: Asparagopsis armata Exudate Cocktail: The Quest for the Mechanisms of Toxic Action of an Invasive Seaweed on Marine Invertebrates
Source: PubMed Central journal article supplement (PMC8002046; doi:10.3390/biology10030223), 2021-03-14
Supplement: biology-10-00223-s001.pdf [file biology-10-00223-s001.pdf]

Supplementary Materials

# Asparagopsis armata Exudate Cocktail: The Quest for the Mechanisms of Toxic Action of an Invasive Seaweed on Marine Invertebrates

Carla O. Silva, Tiago Simões, Rafael Félix, Amadeu M.V.M. Soares, Carlos Barata, Sara C. Novais, and Marco F.L. Lemos

**Table S1.** - Fatty acid composition found in *Gibbula umbilicalis* exposed to *Asparagopsis armata* exudate for 168h, plus control. Data are expressed as mg/g (mean ± standard error). Statistical differences to control (by the Nemenyi post-hoc test) are highlighted (\*  $p < 0.05$ ; \*\*  $p < 0.01$ ; \*\*\*  $p < 0.001$ ). SFA = saturated fatty acid; MUFA = monounsaturated fatty acid; PUFA = polyunsaturated fatty acid.

|           |             | <i>Asparagopsis armata</i> Exudate (%) |              |               |              |              |                 |                 |
|-----------|-------------|----------------------------------------|--------------|---------------|--------------|--------------|-----------------|-----------------|
| FA        |             | 0                                      | 0.04         | 0.07          | 0.14         | 0.25         | 0.47            | 0.87            |
| SFA       | C 10:0      | 0.09 ± 0.01                            | 0.06 ± 0.01  | 0.06 ± 0.01   | 0.06 ± 0.01  | 0.04 ± 0.01  | 0.05 ± 0.01 **  | 0.03 ± 0.00 **  |
|           | C 12:0      | 0.52 ± 0.29                            | 0.82 ± 0.28  | 0.94 ± 0.56   | 0.45 ± 0.23  | 0.68 ± 0.22  | 1.13 ± 0.35     | 0.31 ± 0.17     |
|           | C 13:0      | 0.08 ± 0.02                            | 0.11 ± 0.03  | 0.30 ± 0.12   | 0.23 ± 0.07  | 0.22 ± 0.06  | 0.07 ± 0.02     | 0.07 ± 0.02     |
|           | C 14:0      | 0.76 ± 0.12                            | 0.87 ± 0.16  | 0.99 ± 0.28   | 0.69 ± 0.07  | 0.70 ± 0.09  | 1.19 ± 0.13     | 0.56 ± 0.03     |
|           | C 15:0      | 0.07 ± 0.01                            | 0.06 ± 0.01  | 0.09 ± 0.03   | 0.08 ± 0.00  | 0.07 ± 0.01  | 0.11 ± 0.02     | 0.06 ± 0.01     |
|           | C 16:0      | 7.15 ± 1.01                            | 7.46 ± 1.12  | 8.16 ± 1.22   | 8.08 ± 1.14  | 7.36 ± 0.53  | 8.64 ± 1.47     | 7.39 ± 1.48     |
|           | C 17:0      | 0.04 ± 0.02                            | 0.03 ± 0.01  | 0.02 ± 0.01   | 0.03 ± 0.01  | 0.03 ± 0.01  | 0.04 ± 0.02     | 0.04 ± 0.01     |
|           | C 18:0      | 5.98 ± 0.62                            | 6.90 ± 1.48  | 6.98 ± 0.95   | 7.92 ± 1.64  | 6.67 ± 0.30  | 7.07 ± 1.18     | 6.26 ± 1.05     |
|           | C 20:0      | 0.00 ± 0.00                            | 0.00 ± 0.00  | 0.00 ± 0.00   | 0.00 ± 0.00  | 0.00 ± 0.00  | 0.00 ± 0.00     | 0.00 ± 0.00     |
|           | C 22:0      | 0.02 ± 0.01                            | 0.08 ± 0.06  | 0.01 ± 0.01   | 0.01 ± 0.00  | 0.00 ± 0.00* | 0.01 ± 0.00     | 0.00 ± 0.00*    |
| C 24:0    | 0.11 ± 0.02 | 0.10 ± 0.03                            | 0.10 ± 0.05  | 0.07 ± 0.02   | 0.14 ± 0.06  | 0.08 ± 0.03  | 0.04 ± 0.01     |                 |
| ΣSFA      |             | 14.69 ± 1.64                           | 16.38 ± 2.53 | 17.67 ± 2.87  | 17.54 ± 2.61 | 15.77 ± 0.55 | 18.30 ± 2.51    | 14.72 ± 2.41    |
| MUFA      | C 14:1      | 0.05 ± 0.01                            | 0.02 ± 0.01  | 0.02 ± 0.00   | 0.01 ± 0.00  | 0.00 ± 0.00* | 0.02 ± 0.01     | 0.01 ± 0.00     |
|           | C 15:1      | 0.01 ± 0.00                            | 0.00 ± 0.00  | 0.01 ± 0.00   | 0.01 ± 0.01  | 0.01 ± 0.00  | 0.02 ± 0.01     | 0.01 ± 0.00     |
|           | C 16:1 n5   | 0.03 ± 0.01                            | 0.04 ± 0.01  | 0.04 ± 0.01   | 0.08 ± 0.01  | 0.07 ± 0.01  | 0.14 ± 0.04 *** | 0.10 ± 0.02 *** |
|           | C 16:1 n7   | 0.25 ± 0.13                            | 0.14 ± 0.03  | 0.13 ± 0.03   | 0.22 ± 0.08  | 0.15 ± 0.02  | 0.32 ± 0.12     | 0.12 ± 0.02     |
|           | C 16:1 n9   | 0.01 ± 0.00                            | 0.01 ± 0.00  | 0.01 ± 0.00   | 0.01 ± 0.00  | 0.01 ± 0.00  | 0.04 ± 0.03     | 0.01 ± 0.00     |
|           | C 17:1      | 0.02 ± 0.01                            | 0.01 ± 0.00  | 0.01 ± 0.00   | 0.01 ± 0.01  | 0.01 ± 0.00  | 0.01 ± 0.00     | 0.02 ± 0.01     |
|           | C 18:1 n7   | 0.01 ± 0.00                            | 0.05 ± 0.02* | 0.03 ± 0.02   | 0.03 ± 0.01  | 0.02 ± 0.01  | 0.08 ± 0.04     | 0.03 ± 0.01     |
|           | C 18:1 n9   | 1.95 ± 0.37                            | 2.47 ± 0.73  | 2.97 ± 1.27   | 1.53 ± 0.38  | 3.19 ± 1.23  | 1.69 ± 0.19     | 1.22 ± 0.36     |
|           | C 20:1 n9   | 0.27 ± 0.13                            | 0.17 ± 0.03  | 0.21 ± 0.02   | 0.13 ± 0.05  | 0.15 ± 0.03  | 0.13 ± 0.02*    | 0.15 ± 0.04     |
|           | C 22:1 n9   | 0.01 ± 0.00                            | 0.01 ± 0.00  | 0.05 ± 0.04   | 0.02 ± 0.02  | 0.00 ± 0.00  | 0.06 ± 0.05     | 0.02 ± 0.01     |
| C 24:1 n9 | 0.18 ± 0.07 | 0.13 ± 0.06                            | 0.13 ± 0.06  | 0.02 ± 0.01   | 0.01 ± 0.00  | 0.11 ± 0.06  | 0.13 ± 0.05     |                 |
| ΣMUFA     |             | 2.79 ± 0.45                            | 3.04 ± 0.79  | 3.60 ± 1.35   | 2.08 ± 0.40  | 3.62 ± 1.24  | 2.63 ± 0.35     | 1.80 ± 0.42     |
| PUFA      | C 16:2 n4   | 0.10 ± 0.02                            | 0.12 ± 0.03  | 0.12 ± 0.02   | 0.14 ± 0.03  | 0.10 ± 0.02  | 0.13 ± 0.03     | 0.16 ± 0.05     |
|           | C 16:2 n7   | 0.00 ± 0.00                            | 0.00 ± 0.00  | 0.00 ± 0.00   | 0.00 ± 0.00  | 0.00 ± 0.00  | 0.00 ± 0.00     | 0.00 ± 0.00     |
|           | C 18:2 n6   | 0.69 ± 0.14                            | 0.76 ± 0.12  | 0.92 ± 0.20   | 0.56 ± 0.07  | 0.69 ± 0.22  | 0.87 ± 0.19     | 0.64 ± 0.09     |
|           | C 16:3 n4   | 0.09 ± 0.08                            | 0.00 ± 0.00  | 0.00 ± 0.00   | 0.00 ± 0.00  | 0.00 ± 0.00  | 0.00 ± 0.00     | 0.01 ± 0.00     |
|           | C 18:3 n6   | 0.01 ± 0.00                            | 0.03 ± 0.01  | 0.04 ± 0.03   | 0.010.00     | 0.03 ± 0.01  | 0.08 ± 0.05     | 0.02 ± 0.01     |
|           | C 18:3 n3   | 0.05 ± 0.01                            | 0.15 ± 0.06  | 0.10 ± 0.04   | 0.10 ± 0.04  | 0.07 ± 0.02  | 0.17 ± 0.04     | 0.06 ± 0.02     |
|           | C 18:4 n1   | 0.02 ± 0.00                            | 0.01 ± 0.00  | 0.04 ± 0.02   | 0.02 ± 0.00  | 0.03 ± 0.02  | 0.02 ± 0.01     | 0.01 ± 0.00     |
|           | C 18:4 n3   | 0.04 ± 0.03                            | 0.30 ± 0.18  | 0.09 ± 0.01   | 0.26 ± 0.16  | 0.19 ± 0.06  | 0.14 ± 0.03     | 0.10 ± 0.02     |
| C 20:2 n6 | 0.26 ± 0.10 | 0.27 ± 0.18                            | 0.48 ± 0.27  | 0.06 ± 0.02 * | 0.12 ± 0.05  | 0.34 ± 0.08  | 0.21 ± 0.06     |                 |
| C 20:3 n3 | 0.02 ± 0.01 | 0.01 ± 0.00                            | 0.01 ± 0.00  | 0.01 ± 0.00   | 0.01 ± 0.00  | 0.01 ± 0.00  | 0.01 ± 0.00     |                 |

|            |             |                  |               |                |                |                 |                 |
|------------|-------------|------------------|---------------|----------------|----------------|-----------------|-----------------|
| C 20:3 n6  | 0.12 ± 0.01 | 0.13 ± 0.02      | 0.13 ± 0.02   | 0.08 ± 0.01    | 0.07 ± 0.01 *  | 0.16 ± 0.03     | 0.10 ± 0.01     |
| C 20:4 n3  | 0.09 ± 0.07 | 0.07 ± 0.05      | 0.05 ± 0.02   | 0.09 ± 0.08    | 0.21 ± 0.08    | 0.04 ± 0.02     | 0.07 ± 0.05     |
| C 20:4 n6  | 0.20 ± 0.04 | 0.20 ± 0.02      | 0.24 ± 0.06   | 0.47 ± 0.06    | 0.46 ± 0.03    | 0.77 ± 0.14 *** | 0.55 ± 0.09 *** |
| C 20:5 n3  | 0.38 ± 0.10 | 0.53 ± 0.10      | 0.38 ± 0.08   | 0.64 ± 0.05    | 0.57 ± 0.06    | 1.00 ± 0.28     | 0.65 ± 0.24     |
| C 21:5 n3  | 0.00 ± 0.00 | 0.01 ± 0.00      | 0.00 ± 0.00   | 0.00 ± 0.00*   | 0.01 ± 0.00    | 0.01 ± 0.00     | 0.00 ± 0.00     |
| C 22:2 n6  | 0.02 ± 0.01 | 0.01 ± 0.00      | 0.02 ± 0.01   | 0.01 ± 0.01    | 0.01 ± 0.00    | 0.04 ± 0.02     | 0.02 ± 0.01     |
| C 22:3 n6  | 0.02 ± 0.01 | 0.02 ± 0.01      | 0.00 ± 0.00 * | 0.03 ± 0.01    | 0.00 ± 0.00    | 0.00 ± 0.00     | 0.01 ± 0.00     |
| 22:4 n6    | 0.01 ± 0.00 | 0.00 ± 0.00      | 0.02 ± 0.01   | 0.03 ± 0.01    | 0.05 ± 0.01 ** | 0.05 ± 0.04     | 0.03 ± 0.01     |
| C 22:5 n3  | 0.08 ± 0.02 | 0.13 ± 0.02      | 0.13 ± 0.03   | 0.30 ± 0.04 ** | 0.29 ± 0.01 ** | 0.45 ± 0.13 **  | 0.22 ± 0.03     |
| 22:5 n6    | 0.01 ± 0.00 | 0.03 ± 0.01      | 0.02 ± 0.01   | 0.01 ± 0.00    | 0.02 ± 0.01    | 0.03 ± 0.02     | 0.02 ± 0.01     |
| C 22:6 n3  | 0.22 ± 0.07 | 0.48 ± 0.14      | 0.25 ± 0.11   | 0.40 ± 0.05    | 0.36 ± 0.11    | 0.64 ± 0.23     | 0.74 ± 0.38     |
| ∑PUFA      | 2.56 ± 0.45 | 3.25 ± 0.38      | 3.01 ± 0.67   | 1.43 ± 0.18    | 3.26 ± 0.36    | 4.91 ± 0.93     | 3.62 ± 0.88     |
| Unsat./Sat | 0.36 ± 0.02 | 0.42 ± 0.05      | 0.35 ± 0.04   | 0.33 ± 0.04    | 0.44 ± 0.07    | 0.41 ± 0.03     | 0.39 ± 0.06     |
| n3         | 1.04 ± 0.30 | 1.68 ± 0.32      | 1.01 ± 0.20   | 1.80 ± 0.25    | 1.70 ± 0.25    | 2.45 ± 0.64     | 1.86 ± 0.64     |
| n6         | 1.34 ± 0.27 | 1.45 ± 0.30      | 1.88 ± 0.55   | 1.26 ± 0.07    | 1.46 ± 0.25    | 2.33 ± 0.32     | 1.59 ± 0.23     |
| n7         | 0.26 ± 0.13 | 14.40 ± 2.55 *** | 0.16 ± 0.05   | 0.25 ± 0.08    | 0.17 ± 0.02    | 0.40 ± 0.15     | 0.15 ± 0.03     |
| n9         | 2.41 ± 0.40 | 0.58 ± 0.14 **   | 3.37 ± 1.30   | 1.71 ± 0.39    | 3.35 ± 1.23    | 2.03 ± 0.26     | 1.53 ± 0.39     |
| n3/n6      | 0.85 ± 0.20 | 1.48 ± 0.37      | 0.68 ± 0.18   | 1.46 ± 0.24    | 1.32 ± 0.26    | 1.00 ± 0.20     | 1.07 ± 0.22     |
| N          | 7           | 6                | 6             | 7              | 7              | 6               | 6               |

**Table S2** - Fatty acid composition found in *Palaemon elegans* exposed to *Asparagopsis armata* exudate for 168h, plus control. Data are expressed as mg/g (mean ± standard error). Statistical differences to control (by the Nemenyi post-hoc test) are highlighted (\*  $p < 0.05$ ; \*\*  $p < 0.01$ ; \*\*\*  $p < 0.001$ ). SFA = saturated fatty acid; MUFA = monounsaturated fatty acid; PUFA = polyunsaturated fatty acid.

|           |              | <i>Asparagopsis armata</i> Exudate (%) |             |              |              |                 |                 |                 |
|-----------|--------------|----------------------------------------|-------------|--------------|--------------|-----------------|-----------------|-----------------|
| FA        | 0            | 0.11                                   | 0.21        | 0.39         | 0.72         | 1.33            | 2.46            |                 |
| SFA       | C 10:0       | 0.06 ± 0.02                            | 0.05 ± 0.02 | 0.04 ± 0.01  | 0.04 ± 0.01  | 0.11 ± 0.02 **  | 0.06 ± 0.01     | 0.07 ± 0.01     |
|           | C 12:0       | 1.12 ± 0.57                            | 0.33 ± 0.16 | 0.30 ± 0.11  | 1.09 ± 0.42  | 0.62 ± 0.20     | 0.35 ± 0.21     | 0.57 ± 2.69     |
|           | C 13:0       | 0.59 ± 0.22                            | 0.27 ± 0.07 | 0.08 ± 0.02  | 0.08 ± 0.03  | 0.07 ± 0.02 *** | 0.07 ± 0.01 *** | 0.04 ± 0.01 *** |
|           | C 14:0       | 0.83 ± 0.27                            | 0.43 ± 0.08 | 0.24 ± 0.05  | 0.79 ± 0.27  | 0.60 ± 0.12     | 0.42 ± 0.14     | 0.57 ± 0.13     |
|           | C 15:0       | 0.05 ± 0.01                            | 0.04 ± 0.01 | 0.03 ± 0.00  | 0.05 ± 0.01  | 0.06 ± 0.01     | 0.04 ± 0.01     | 0.08 ± 0.03     |
|           | C 16:0       | 7.15 ± 1.44                            | 5.21 ± 0.46 | 3.68 ± 0.44  | 5.48 ± 1.26  | 5.49 ± 1.13     | 4.49 ± 0.65     | 5.67 ± 0.95     |
|           | C 17:0       | 0.03 ± 0.00                            | 0.02 ± 0.00 | 0.01 ± 0.00  | 0.02 ± 0.01  | 0.03 ± 0.01     | 0.02 ± 0.00     | 0.03 ± 0.01     |
|           | C 18:0       | 7.89 ± 1.95                            | 5.32 ± 0.66 | 3.96 ± 0.64  | 7.25 ± 1.81  | 5.34 ± 0.91     | 4.65 ± 0.78     | 5.64 ± 0.90     |
|           | C 20:0       | 0.00 ± 0.00                            | 0.00 ± 0.00 | 0.00 ± 0.00  | 0.00 ± 0.00  | 0.00 ± 0.00     | 0.00 ± 0.00     | 0.02 ± 0.02     |
|           | C 22:0       | 0.10 ± 0.05                            | 0.01 ± 0.00 | 0.01 ± 0.00  | 0.03 ± 0.01  | 0.03 ± 0.01     | 0.02 ± 0.01     | 0.15 ± 0.12     |
| C 24:0    | 0.01 ± 0.00  | 0.07 ± 0.03                            | 0.04 ± 0.02 | 0.01 ± 0.00  | 0.01 ± 0.00  | 0.01 ± 0.01     | 0.13 ± 0.08     |                 |
| ∑SFA      | 11.26 ± 2.48 | 11.69 ± 1.23                           | 8.35 ± 1.02 | 14.82 ± 3.59 | 12.35 ± 2.13 | 10.11 ± 1.70    | 11.26 ± 2.48    |                 |
| MUFA      | C 14:1       | 0.01 ± 0.01                            | 0.00 ± 0.00 | 0.01 ± 0.01  | 0.01 ± 0.00  | 0.02 ± 0.00     | 0.01 ± 0.00     | 0.01 ± 0.01     |
|           | C 15:1       | 0.00 ± 0.00                            | 0.00 ± 0.00 | 0.00 ± 0.00  | 0.00 ± 0.00  | 0.01 ± 0.00     | 0.00 ± 0.00     | 0.04 ± 0.01 **  |
|           | C 16:1 n5    | 0.03 ± 0.01                            | 0.03 ± 0.00 | 0.02 ± 0.00  | 0.02 ± 0.01  | 0.03 ± 0.01     | 0.02 ± 0.00     | 0.03 ± 0.01     |
|           | C 16:1 n7    | 0.23 ± 0.07                            | 0.13 ± 0.06 | 0.07 ± 0.01  | 0.09 ± 0.02  | 0.16 ± 0.04     | 0.11 ± 0.03     | 0.14 ± 0.02     |
|           | C 16:1 n9    | 0.03 ± 0.02                            | 0.01 ± 0.00 | 0.00 ± 0.00  | 0.01 ± 0.00  | 0.01 ± 0.00     | 0.00 ± 0.00     | 0.01 ± 0.00     |
|           | C 17:1       | 0.01 ± 0.01                            | 0.01 ± 0.00 | 0.01 ± 0.00  | 0.01 ± 0.00  | 0.02 ± 0.00     | 0.01 ± 0.00     | 0.02 ± 0.00     |
|           | C 18:1 n7    | 0.05 ± 0.02                            | 0.03 ± 0.01 | 0.01 ± 0.01  | 0.01 ± 0.00  | 0.04 ± 0.01     | 0.02 ± 0.00     | 0.04 ± 0.01     |
|           | C 18:1 n9    | 2.84 ± 1.45                            | 1.48 ± 0.21 | 0.51 ± 0.17  | 1.37 ± 0.41  | 1.77 ± 0.49     | 1.16 ± 0.24     | 0.01 ± 0.00     |
|           | C 20:1 n9    | 0.02 ± 0.01                            | 0.02 ± 0.01 | 0.00 ± 0.00  | 0.01 ± 0.00  | 0.00 ± 0.00     | 0.00 ± 0.00 **  | 0.00 ± 0.00 **  |
| C 22:1 n9 | 0.01 ± 0.00  | 0.01 ± 0.01                            | 0.00 ± 0.00 | 0.05 ± 0.04  | 0.01 ± 0.00  | 0.00 ± 0.00     | 0.00 ± 0.00     |                 |
| C 24:1 n9 | 0.09 ± 0.03  | 0.16 ± 0.05                            | 0.09 ± 0.03 | 0.11 ± 0.03  | 0.18 ± 0.11  | 0.08 ± 0.03     | 0.08 ± 0.04     |                 |
| ∑MUFA     | 3.31 ± 1.54  | 1.88 ± 0.26                            | 0.73 ± 0.18 | 1.70 ± 0.44  | 2.25 ± 0.59  | 1.42 ± 0.26     | 2.64 ± 0.74     |                 |
| PUFA      | C 16:2 n4    | 0.15 ± 0.04                            | 0.11 ± 0.01 | 0.08 ± 0.01  | 0.13 ± 0.04  | 0.14 ± 0.03     | 0.10 ± 0.02     | 0.13 ± 0.02     |
|           | C 16:2 n7    | 0.00 ± 0.00                            | 0.00 ± 0.00 | 0.00 ± 0.00  | 0.00 ± 0.00  | 0.00 ± 0.00     | 0.00 ± 0.00     | 0.00 ± 0.00     |
|           | C 18:2 n6    | 0.88 ± 0.27                            | 0.48 ± 0.05 | 0.22 ± 0.03  | 0.67 ± 0.30  | 1.30 ± 0.64     | 0.38 ± 0.08     | 0.43 ± 0.10     |
|           | C 16:3 n4    | 0.03 ± 0.01                            | 0.02 ± 0.00 | 0.02 ± 0.00  | 0.03 ± 0.01  | 0.02 ± 0.00     | 0.01 ± 0.00     | 0.02 ± 0.00     |

|            |             |             |                |                 |                |             |               |
|------------|-------------|-------------|----------------|-----------------|----------------|-------------|---------------|
| C 18:3 n6  | 0.02 ± 0.01 | 0.01 ± 0.01 | 0.01 ± 0.01    | 0.01 ± 0.01     | 0.02 ± 0.01    | 0.03 ± 0.01 | 0.11 ± 0.08   |
| C 18:3 n3  | 0.07 ± 0.02 | 0.05 ± 0.01 | 0.01 ± 0.00*   | 0.03 ± 0.02     | 0.09 ± 0.03    | 0.05 ± 0.02 | 0.03 ± 0.01   |
| C 18:4 n1  | 0.15 ± 0.04 | 0.12 ± 0.13 | 0.08 ± 0.01    | 0.10 ± 0.02     | 0.20 ± 0.04    | 0.12 ± 0.01 | 0.16 ± 0.02   |
| C 18:4 n3  | 0.26 ± 0.18 | 0.17 ± 0.08 | 0.10 ± 0.04    | 0.17 ± 0.10     | 0.09 ± 0.03    | 0.12 ± 0.05 | 0.19 ± 0.06   |
| C 20:2 n6  | 0.40 ± 0.29 | 0.08 ± 0.02 | 0.08 ± 0.05    | 0.20 ± 0.10     | 0.20 ± 0.06    | 0.07 ± 0.04 | 0.08 ± 0.04   |
| C 20:3 n3  | 0.02 ± 0.01 | 0.01 ± 0.01 | 0.01 ± 0.00    | 0.01 ± 0.00     | 0.02 ± 0.00    | 0.01 ± 0.00 | 0.03 ± 0.02   |
| C 20:3 n6  | 0.07 ± 0.07 | 0.07 ± 0.03 | 0.05 ± 0.01    | 0.08 ± 0.02     | 0.07 ± 0.01    | 0.05 ± 0.01 | 0.07 ± 0.01   |
| C 20:4 n3  | 0.02 ± 0.01 | 0.13 ± 0.27 | 0.05 ± 0.02    | 0.02 ± 0.02     | 0.02 ± 0.01    | 0.07 ± 0.05 | 0.15 ± 0.07   |
| C 20:4 n6  | 0.12 ± 0.05 | 0.14 ± 0.07 | 0.06 ± 0.02    | 0.05 ± 0.02     | 0.21 ± 0.03 *  | 0.10 ± 0.02 | 0.14 ± 0.03   |
| C 20:5 n3  | 0.68 ± 0.23 | 0.59 ± 0.34 | 0.32 ± 0.09    | 0.30 ± 0.08     | 0.83 ± 0.17    | 0.40 ± 0.09 | 0.58 ± 0.15   |
| C 21:5 n3  | 0.01 ± 0.00 | 0.00 ± 0.00 | 0.01 ± 0.00    | 0.02 ± 0.01     | 0.01 ± 0.00 ** | 0.00 ± 0.00 | 0.00 ± 0.00   |
| C 22:2 n6  | 0.03 ± 0.01 | 0.01 ± 0.01 | 0.02 ± 0.01    | 0.01 ± 0.00     | 0.09 ± 0.03 ** | 0.07 ± 0.02 | 0.06 ± 0.02   |
| C 22:3 n6  | 0.00 ± 0.00 | 0.00 ± 0.00 | 0.00 ± 0.00    | 0.00 ± 0.00     | 0.01 ± 0.00 *  | 0.00 ± 0.00 | 0.01 ± 0.00 * |
| 22:4 n6    | 0.04 ± 0.04 | 0.00 ± 0.00 | 0.00 ± 0.00    | 0.00 ± 0.00     | 0.00 ± 0.00    | 0.00 ± 0.00 | 0.00 ± 0.00   |
| C 22:5 n3  | 0.03 ± 0.00 | 0.05 ± 0.04 | 0.02 ± 0.01    | 0.04 ± 0.02     | 0.13 ± 0.03 ** | 0.06 ± 0.01 | 0.03 ± 0.01   |
| 22:5 n6    | 0.01 ± 0.01 | 0.00 ± 0.00 | 0.00 ± 0.00    | 0.00 ± 0.00     | 0.03 ± 0.01    | 0.00 ± 0.00 | 0.01 ± 0.00   |
| C 22:6 n3  | 0.28 ± 0.06 | 0.29 ± 0.15 | 0.15 ± 0.05    | 0.14 ± 0.06     | 0.55 ± 0.16    | 0.29 ± 0.09 | 0.38 ± 0.10   |
| ∑PUFA      | 3.21 ± 0.79 | 2.23 ± 0.32 | 1.21 ± 0.14 ** | 1.94 ± 0.51     | 3.85 ± 0.80    | 1.83 ± 0.37 | 3.60 ± 0.96   |
| Unsat./Sat | 0.36 ± 0.07 | 0.35 ± 0.02 | 0.26 ± 0.05    | 0.26 ± 0.04 *   | 0.47 ± 0.06    | 0.32 ± 0.02 | 1.25 ± 0.86   |
| n3         | 1.38 ± 0.36 | 1.29 ± 0.27 | 0.67 ± 0.14 *  | 0.75 ± 0.17     | 1.75 ± 0.33    | 1.02 ± 0.28 | 2.50 ± 0.93   |
| n6         | 1.65 ± 0.63 | 0.80 ± 0.08 | 0.45 ± 0.08    | 1.04 ± 0.37     | 1.95 ± 0.69    | 0.70 ± 0.15 | 0.94 ± 0.13   |
| n7         | 0.28 ± 0.08 | 0.15 ± 0.03 | 0.09 ± 0.02    | 0.10 ± 0.03     | 0.21 ± 0.04    | 0.13 ± 0.03 | 0.18 ± 0.03   |
| n9         | 2.98 ± 1.49 | 1.68 ± 0.25 | 0.61 ± 0.17    | 0.27 ± 0.08 *** | 0.79 ± 0.18    | 0.44 ± 0.10 | 0.73 ± 0.10   |
| n3/n6      | 1.32 ± 0.56 | 1.61 ± 0.28 | 1.84 ± 0.43    | 1.75 ± 0.72     | 1.52 ± 0.35    | 1.99 ± 0.50 | 2.81 ± 1.03   |
| N          | 5           | 8           | 7              | 7               | 7              | 8           | 7             |

**Table S3.** Differences between FA classes across the clustered FAs found in *Gibbula umbilicalis* exposed to *Asparagopsis armata* exudate for 168h, plus control. Data are expressed as mg/g (mean ± standard error). Statistical differences to control (by the Nemenyi post-hoc test) are highlighted (\*  $p < 0.05$ ; \*\*  $p < 0.01$ ; \*\*\*  $p < 0.001$ ). SFA = saturated fatty acid; MUFA = monounsaturated fatty acid; PUFA = polyunsaturated fatty acid.

| FA         | <i>Asparagopsis armata</i> exudate (%) |             |             |                |                |                |                 |
|------------|----------------------------------------|-------------|-------------|----------------|----------------|----------------|-----------------|
|            | 0                                      | 0.04        | 0.07        | 0.14           | 0.25           | 0.47           | 0.87            |
| ∑SFA       | 0.16 ± 0.06                            | 0.15 ± 0.2  | 0.09 ± 0.04 | 0.08 ± 0.03    | 0.05 ± 0.02 ** | 0.08 ± 0.03    | 0.04 ± 0.00 8** |
| ∑MUFA      | 0.36 ± 0.09                            | 0.28 ± 0.11 | 0.3 ± 0.07  | 0.26 ± 0.08    | 0.24 ± 0.10    | 0.37 ± 0.26    | 0.29 ± 0.13     |
| ∑PUFA      | 0.69 ± 0.38                            | 0.67 ± 0.58 | 1.02 ± 0.88 | 0.98 ± 0.26    | 1.0 ± 0.19     | 1.78 ± 0.72 *  | 1.1 ± 0.43      |
| Sat/Unsat. | 0.16 ± 0.05                            | 0.18 ± 0.24 | 0.09 ± 0.06 | 0.07 ± 0.03    | 0.04 ± 0.02 ** | 0.04 ± 0.01 ** | 0.04 ± 0.02 **  |
| n3         | 0.08 ± 0.04                            | 0.14 ± 0.07 | 0.13 ± 0.07 | 0.3 ± 0.09 **  | 0.29 ± 0.03 ** | 0.45 ± 0.32 *  | 0.22 ± 0.08     |
| n6         | 0.6 ± 0.36                             | 0.62 ± 0.57 | 0.88 ± 0.82 | 0.67 ± 0.20    | 0.71 ± 0.18    | 1.32 ± 0.45    | 0.89 ± 0.37     |
| n3/n6      | 0.16 ± 0.09                            | 0.31 ± 0.21 | 0.19 ± 0.09 | 0.46 ± 0.11 ** | 0.43 ± 0.11 *  | 0.32 ± 0.18    | 0.25 ± 0.05     |
| N          | 7                                      | 6           | 6           | 7              | 7              | 6              | 6               |

**Table S4.** Differences between FA classes across the clustered FAs found in *Palaemon elegans* exposed to *Asparagopsis armata* exudate for 168h, plus control. Data are expressed as mg/g (mean  $\pm$  standard error). Statistical differences to control (by the Nemenyi post-hoc test) are highlighted (\*  $p < 0.05$ ; \*\*  $p < 0.01$ ; \*\*\*  $p < 0.001$ ). SFA = saturated fatty acid; MUFA = mono-unsaturated fatty acid; PUFA = polyunsaturated fatty acid.

| FA            | <i>Asparagopsis armata</i> Exudate (%) |                 |                   |                   |                   |                   |                    |
|---------------|----------------------------------------|-----------------|-------------------|-------------------|-------------------|-------------------|--------------------|
|               | 0                                      | 0.11            | 0.21              | 0.39              | 0.72              | 1.33              | 2.46               |
| $\Sigma$ SFA  | 0.66 $\pm$ 0.48                        | 0.32 $\pm$ 0.21 | 0.12 $\pm$ 0.07 * | 0.12 $\pm$ 0.09 * | 0.2 $\pm$ 0.09    | 0.14 $\pm$ 0.06 * | 0.11 $\pm$ 0.06 *  |
| $\Sigma$ MUFA | 0.02 $\pm$ 0.02                        | 0.02 $\pm$ 0.02 | 0.006 $\pm$ 0.008 | 0.014 $\pm$ 0.013 | 0.009 $\pm$ 0.008 | 0.0 $\pm$ 0.0     | 0.04 $\pm$ 0.04    |
| $\Sigma$ PUFA | 0.14 $\pm$ 0.11                        | 0.20 $\pm$ 0.08 | 0.1 $\pm$ 0.06    | 0.12 $\pm$ 0.08   | 0.47 $\pm$ 0.11   | 0.25 $\pm$ 0.13   | 0.26 $\pm$ 0.09    |
| Sat/Insat.    | 3.15 $\pm$ 2.25                        | 1.53 $\pm$ 1.03 | 1.35 $\pm$ 0.69   | 1.09 $\pm$ 0.59   | 0.4 $\pm$ 0.15 ** | 0.61 $\pm$ 0.22   | 0.38 $\pm$ 0.19 ** |
| n3            | 0.11 $\pm$ 0.05                        | 0.1 $\pm$ 0.03  | 0.04 $\pm$ 0.02   | 0.10 $\pm$ 0.10   | 0.26 $\pm$ 0.13   | 0.12 $\pm$ 0.08   | 0.07 $\pm$ 0.04    |
| n6            | 0.16 $\pm$ 0.01                        | 0.15 $\pm$ 0.08 | 0.08 $\pm$ 0.05   | 0.07 $\pm$ 0.04   | 0.36 $\pm$ 0.11 * | 0.18 $\pm$ 0.09   | 0.32 $\pm$ 0.07*   |
| n3/n6         | 2.21 $\pm$ 3.41                        | 0.85 $\pm$ 0.52 | 0.70 $\pm$ 0.47   | 1.46 $\pm$ 1.36   | 0.82 $\pm$ 0.53   | 0.63 $\pm$ 0.25   | 0.31 $\pm$ 0.16    |
| N             | 5                                      | 8               | 7                 | 7                 | 7                 | 8                 | 7                  |
